# Supplementary material for: Identification of Diagnostic Metabolic Signatures in Thyroid Tumors using Mass Spectrometry Imaging
Source: Preprints.org preprint supplement (doi:10.20944/preprints202306.1101.v1), 2023-06-15
Supplement: Supplementary file 3 [file supplementary]

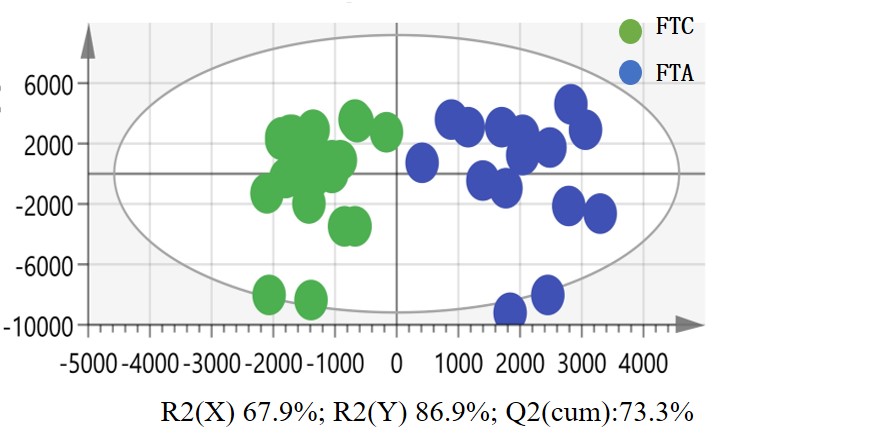


Supplementary Figure 1A

OPLS‐DA score plots based on positive AFAIDESI‐MSI data from FTC and FTA.


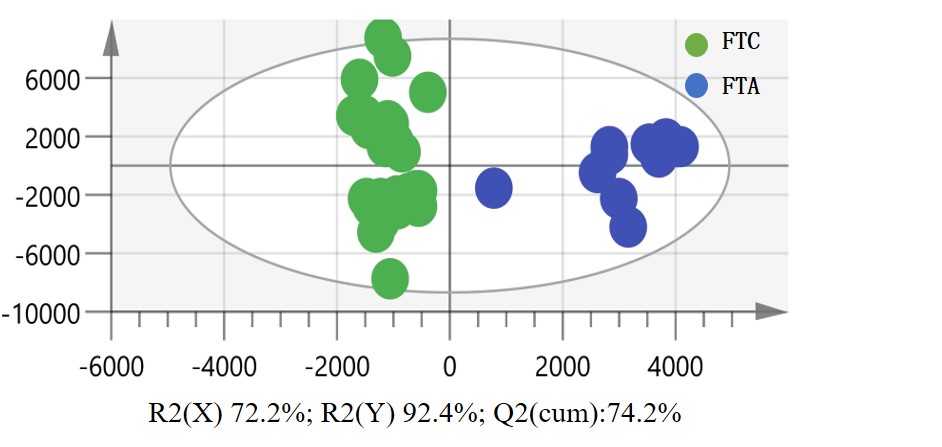


Supplementary Figure 1B

OPLS‐DA score plots based on negative AFAI‐MSI data from FTC and FTA.

Supplementary Table 1 The discriminated meatbolites between FTA and FTC.

| Peak（*m/z*） | Formula | Identification | Ion type |
| --- | --- | --- | --- |
| 758.5623 | C42H80NO8P | PC(34:2) | [M+H]+ |
| 780.5435 | C42H80NO8P | PC(34:2) | [M+Na]+ |
| 782.5669 | C42H82NO8P | PC(34:1) | [M+Na]+ |
| 784.5823 | C42H84 NO8P | PC(34:0) | [M+Na]+ |
| 786.5993 | C44H84NO8P | PC(36:2) | [M+H]+ |
| 804.5503 | C46H78NO8P | PC(38:7) | [M+H]+ |
| 806.5620 | C44H82NO8P | PC(36:3) | [M+Na]+ |
| 808.581 | C44H84NO8P | PC(36:2) | [M+Na]+ |
| 96.9677 | H3PO4 | Phosphoric acid | [M-H]- |
| 309.2038 | C20H38O2 | FA(20:1) | [M-H]- |
| 283.2638 | C18H36O2 | FA(18:0) | [M-H]- |
| 255.2321 | C16H32O2 | FA(16:0) | [M-H]- |
| 329.2383 | C18H34O5 | 9,10,13-TriHOME | [M-H]- |
| 311.2195 | C18H32O4 | 9,10-DiHODE | [M-H]- |
| 215.0308 | C6H12O6 | Glucose | [M+Cl]- |
| 281.2457 | C18H34O2 | FA(18:1) | [M-H]- |
| 279.2291 | C18H32O2 | FA(18:2) | [M-H]- |
| 121.0279 | C7H6O2 | Hydroxybenzaldehyde | [M-H]- |
| 327.2345 | C22H32O2 | FA(22:6) | [M-H]- |
| 293.2008 | C18H30O3 | 11-oxo-(7E,9E)-octdecadienoic acid | [M-H]- |
